# Supplementary material
Source: publisher site journal article supplement (https://www.dovepress.com/article/413587)
Supplement: Supplementary file 1 [file get_supplementary_file.php]

## Supplementary data

**Box 1** Variables collected during electronic medical records review.

An access database was established with the following information from medical records review:

- Personal identification number
- Hospital
- Diagnosis and date of diagnosis according to medical record
- Diagnostic laboratory (separate pathology laboratory or clinic-connected cytology laboratory) with pathologic anatomical diagnosis number and percentage of plasma cells
- Is there a note in the journal about a cancer report?
- Is there a note in the laboratory report if a cancer report has been made?
- Diagnosis after review of medical record data
- Explanatory comment.
